# Supplementary material for: Hierarchically porous N-doped carbon derived from supramolecular assembled polypyrrole as a high performance supercapacitor electrode material
Source: Royal Society of Chemistry journal article supplement (doi:10.1039/c8ra02110d), 2018-01-01
Supplement: c8ra02110d1.pdf [file c8ra02110d1.pdf]

## **Electronic Supplementary Information (ESI)**

### **Hierarchically Porous N-doped Carbon Derived from Supramolecular Assembled Polypyrrole as High Performance Supercapacitor Electrode Material**

Li Lai†, Yu Zhao†, Shu Ying, Lanlan Li, Zhong Ma, and Lijia Pan\*

*National Laboratory of Microstructures, School of Electronic Science and Engineering, Collaborative  
Innovation Center of Advanced Microstructures, Nanjing University, Nanjing 210093, P. R. China*

Email: ljpan@nju.edu.cn

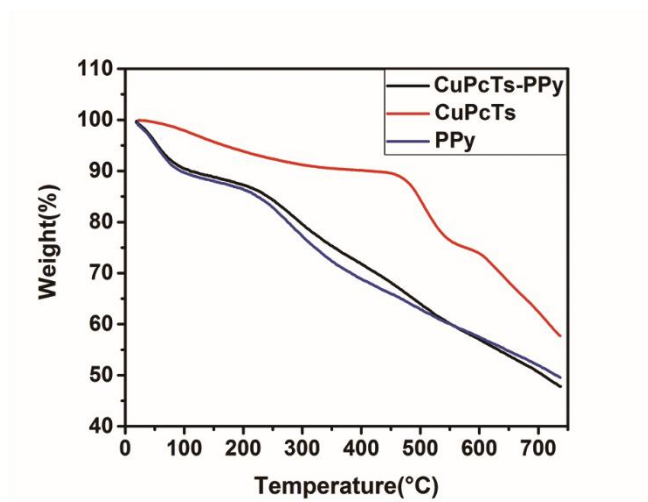

Figure S1. TGA profiles for CuPcTs-PPy, CuPcTs, and PPy.

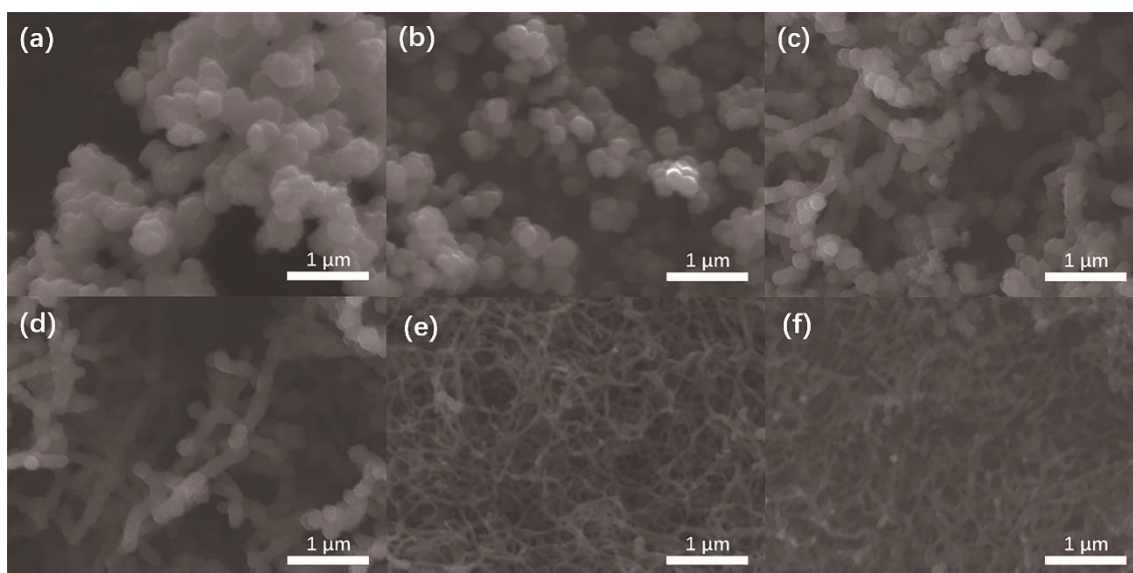

Fig. S2 SEM images of (a) PPy without CuPcTs, and PPy with (b) 0.002 mmol, (c) 0.004 mmol, (d) 0.008 mmol, (e) 0.016 mmol, (f) 0.032 mmol CuPcTs, respectively.

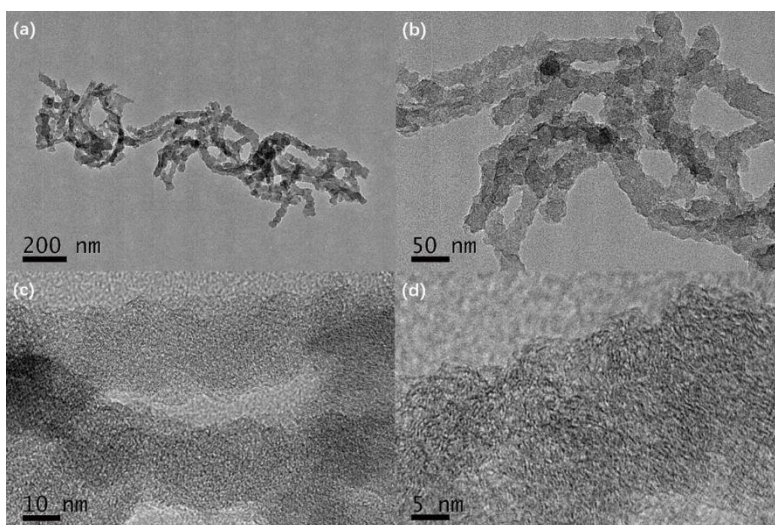

**Figure S3.** TEM images of HPNCs with (a) 200 nm, (b) 50 nm, (c) 10 nm, and (d) 5 scale.

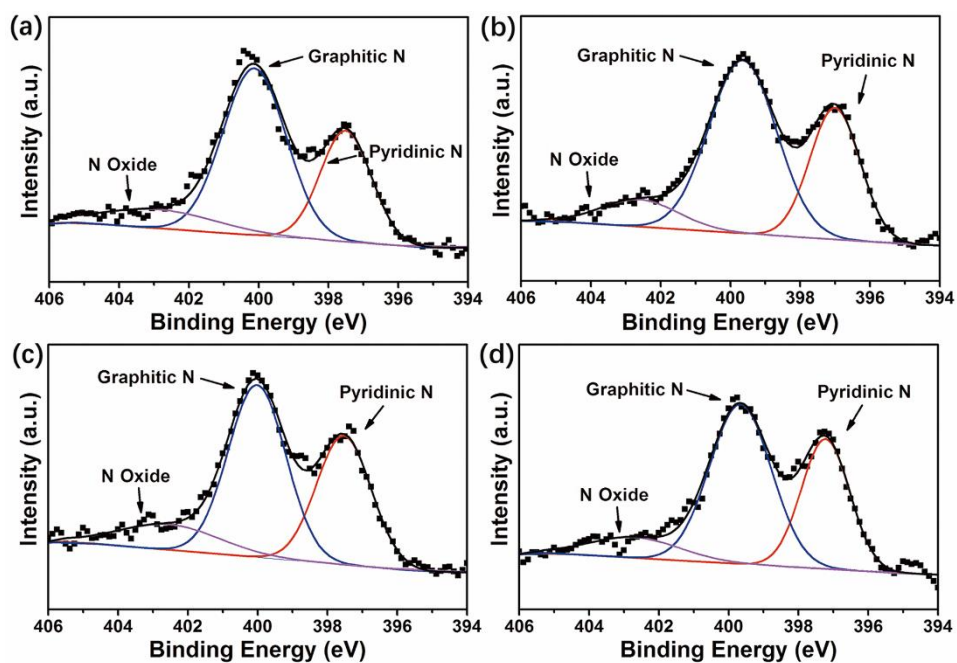

**Fig. S4** N 1s detail spectra of (a) NC-1, (b) NC-2, (c) NC-3, and (d) NC-4 conducted by XPS analysis.

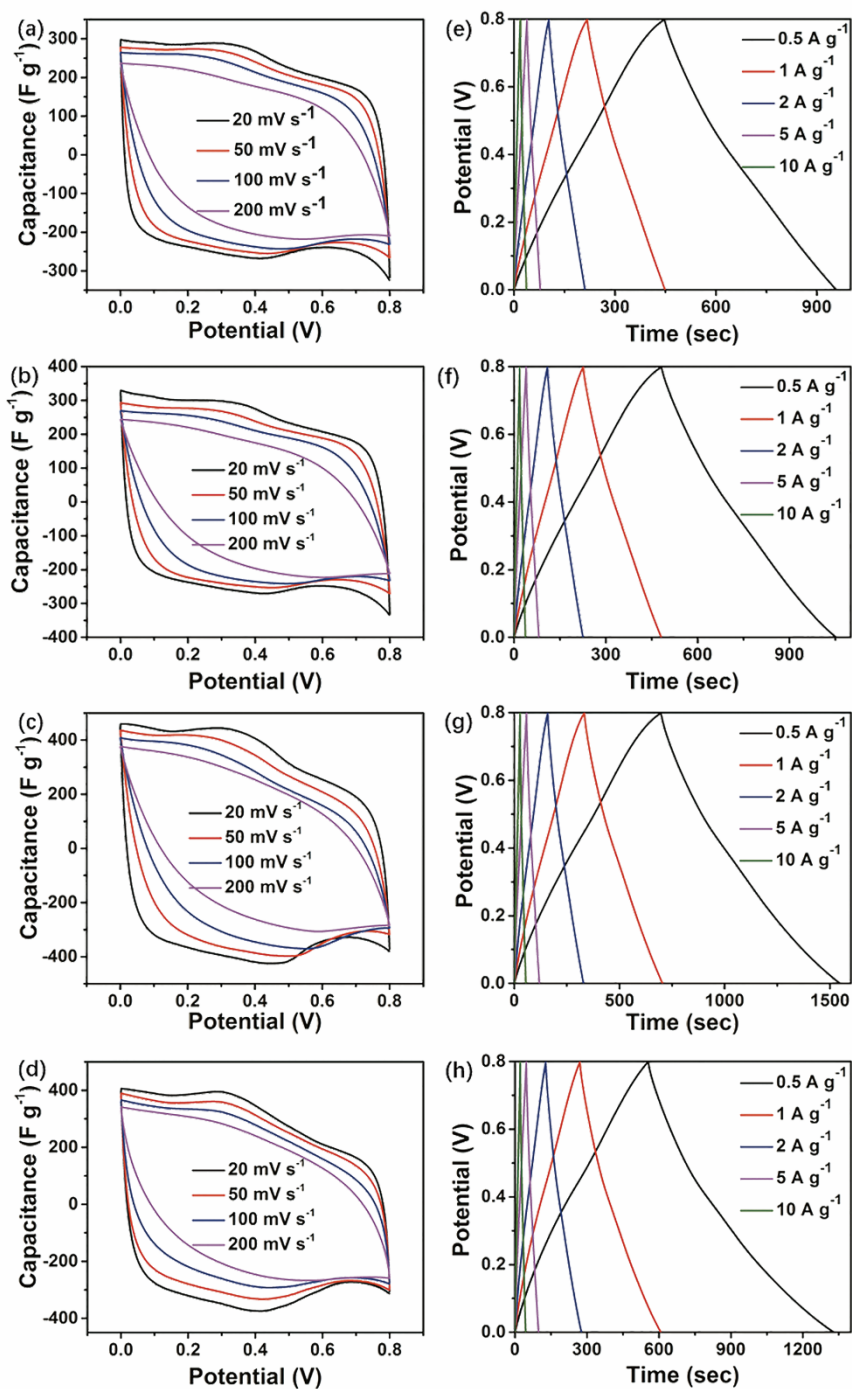

**Fig. S5** CV curves at various scan rates of (a) HPNC-1, (b) HPNC-2, (c) HPNC-3, and (d) HPNC-4, respectively. GCD curves at various current densities of (e) HPNC-1, (f) HPNC-2, (g) HPNC-3, and (h) HPNC-4, respectively.

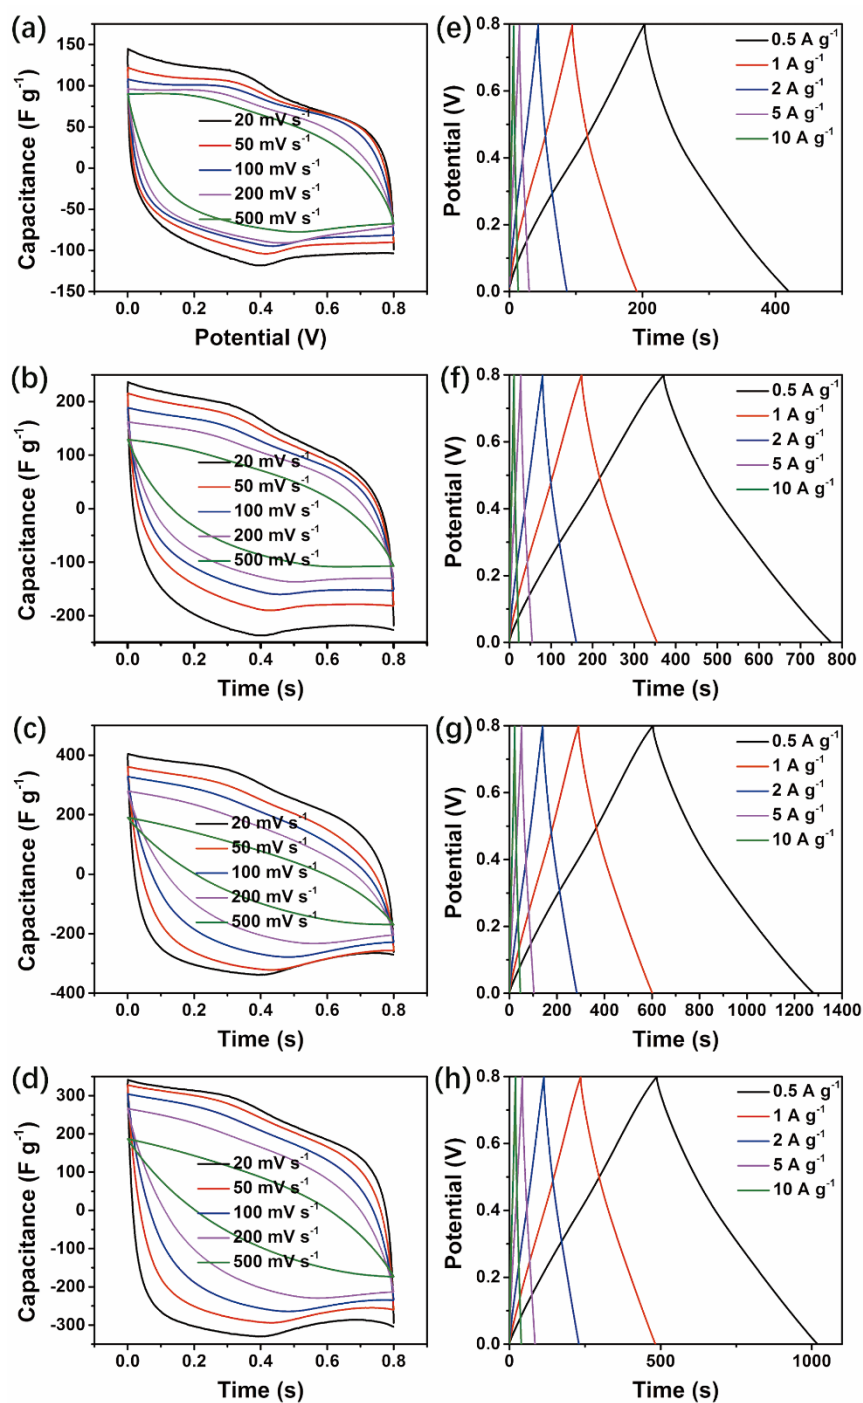

**Fig. S6** CV curves at various scan rates of (a) NC-1, (b) NC-2, (c) NC-3, and (d) NC-4, respectively. GCD curves at various current densities of (e) NC-1, (f) NC-2, (g) NC-3, and (h) NC-4, respectively.

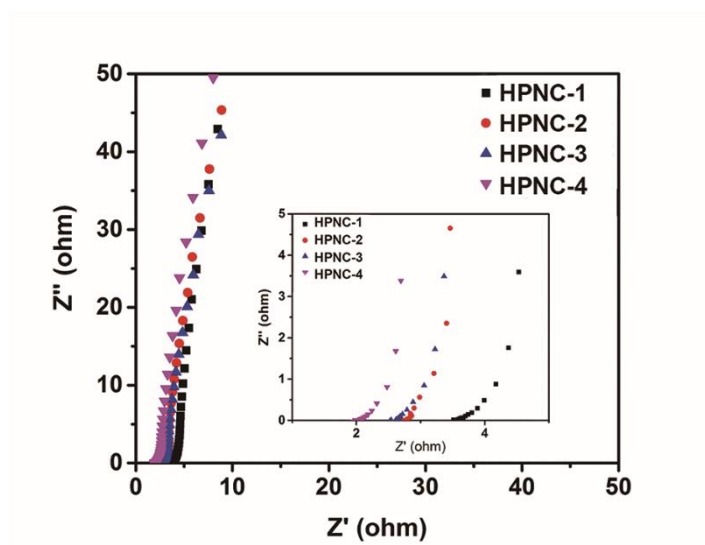

**Figure S7.** Nyquist plots of the HPNCs (inset, zoom in of the plot).

**Table S1** Near surface elemental composition of the NCs from XPS.

| Samples | Elemental composition (atom %) |                                  |      |      |      |
|---------|--------------------------------|----------------------------------|------|------|------|
|         | C                              | N (pyridinic:graphitic:oxidized) | O    | S    | Cu   |
| NC-1    | 88.11                          | 8.77 (2.70:5.03:1.04)            | 2.54 | 0.58 | 0    |
| NC-2    | 87.81                          | 8.70 (2.82:4.99:0.89)            | 2.91 | 0.58 | 0    |
| NC-3    | 86.83                          | 8.79 (3.17:4.47:1.15)            | 3.61 | 0.77 | 0    |
| NC-4    | 86.58                          | 8.86 (3.09:4.85:0.92)            | 3.04 | 0.92 | 0.60 |

**Table S2** Derived carbon materials as electrodes in a two/three electrode system.

| Precursors                    | S <sub>BET</sub> (m <sup>2</sup> g <sup>-1</sup> ) | Electrolyte                          | Rate                   | C <sub>s</sub> (F g <sup>-1</sup> ) | Ref       |
|-------------------------------|----------------------------------------------------|--------------------------------------|------------------------|-------------------------------------|-----------|
| PPy nanobelts                 | > 350                                              | 1 M H <sub>2</sub> SO <sub>4</sub>   | 0.2 A g <sup>-1</sup>  | 467                                 | 1         |
| PPy nanotubes                 | 58.9                                               | 1 M H <sub>2</sub> SO <sub>4</sub>   | 1 mA cm <sup>-2</sup>  | 228                                 | 2         |
| PANI on palygorskite template | 517.02                                             | 1 M H <sub>2</sub> SO <sub>4</sub>   | 1.0 A g <sup>-1</sup>  | 389                                 | 3         |
| PANI & metal salts            | 1645                                               | 1 M KOH                              | 5 mV s <sup>-1</sup>   | 478                                 | 4         |
| PTFE                          | 2302                                               | 6 M KOH                              | 0.02 A g <sup>-1</sup> | 201                                 | 5         |
| Corn straw & soy protein      | 1233.6-1412.9                                      | 6 M KOH                              | 0.05 A g <sup>-1</sup> | 378.9                               | 6         |
| Phytic acid crosslinked PANi  | 4073                                               | 0.5 M H <sub>2</sub> SO <sub>4</sub> | 0.5 A g <sup>-1</sup>  | 225                                 | 7         |
| Chicken egg whites            | 1405                                               | 1 M H <sub>2</sub> SO <sub>4</sub>   | 0.5 A g <sup>-1</sup>  | 481                                 | 8         |
| Willow catkin                 | 1533                                               | 6 M KOH                              | 0.5 A g <sup>-1</sup>  | 298                                 | 9         |
| PPy microsheets               | 2870                                               | 6 M KOH                              | 0.5 A g <sup>-1</sup>  | 318.2                               | 10        |
| F127, DCDA, resol composite   | 494-586                                            | 1 M H <sub>2</sub> SO <sub>4</sub>   | 0.2 A g <sup>-1</sup>  | 262                                 | 11        |
| PPy @ carbon nanofibers       | 562.51                                             | 6 M KOH                              | 1.0 A g <sup>-1</sup>  | 202                                 | 12        |
| PPy nanospheres               | 1080                                               | 0.5 M H <sub>2</sub> SO <sub>4</sub> | 100 mV s <sup>-1</sup> | 237.9                               | 13        |
| CuPcTs assembled PPy          | 2113.2                                             | 1 M H <sub>2</sub> SO <sub>4</sub>   | 0.5 A g <sup>-1</sup>  | 435.6                               | This work |

## References

- 1 C. Su, C. Pei, B. Wu, J. Qian and Y. Tan, *Small*, 2017, **13**, 1–12.
- 2 D. P. Dubal, N. R. Chodankar, Z. Caban-Huertas, F. Wolfart, M. Vidotti, R. Holze, C. D. Lokhande and P. Gomez-Romero, *J. Power Sources*, 2016, **308**, 158–165.
- 3 S. Zuo, J. Chen, W. Liu, X. Li, Y. Kong, C. Yao and Y. Fu, *Carbon N. Y.*, 2018, **129**, 199–206.
- 4 H. Sheng, M. Wei, A. D'Aloia and G. Wu, *ACS Appl. Mater. Interfaces*, 2016, **8**, 30212–30224.
- 5 W. Li, S. Liu, N. Pan, F. Zeng, Y. Liu, M. Zheng and Y. Liang, *J. Power Sources*, 2017, **357**, 138–143
- 6 Q. Xie, R. Bao, A. Zheng, Y. Zhang, S. Wu, C. Xie and P. Zhao, *ACS Sustain. Chem. Eng.*, 2016, **4**, 1422–1430.

- 7 J. W. F. To, Z. Chen, H. Yao, J. He, K. Kim, H. H. Chou, L. Pan, J. Wilcox, Y. Cui and Z. Bao, *ACS Cent. Sci.*, 2015, **1**, 68–76.
- 8 Z. Li, Z. Xu, H. Wang, J. Ding, B. Zahiri, C. M. B. Holt, X. Tan and D. Mitlin, *Energy Environ. Sci.*, 2014, **7**, 1708–1718.
- 9 Y. Li, G. Wang, T. Wei, Z. Fan and P. Yan, *Nano Energy*, 2016, **19**, 165–175.
- 10 L. Qie, W. Chen, H. Xu, X. Xiong, Y. Jiang, F. Zou, X. Hu, Y. Xin, Z. Zhang and Y. Huang, *Energy Environ. Sci.*, 2013, **6**, 2497.
- 11 J. Wei, D. Zhou, Z. Sun, Y. Deng, Y. Xia and D. Zhao, *Adv. Funct. Mater.*, 2013, **23**, 2322–2328.
- 12 L. F. Chen, X. D. Zhang, H. W. Liang, M. Kong, Q. F. Guan, P. Chen, Z. Y. Wu and S. H. Yu, *ACS Nano*, 2012, **6**, 7092–7102.
- 13 F. Su, C. K. Poh, J. S. Chen, G. Xu, D. Wang, Q. Li, J. Lin and X. W. Lou, *Energy Environ. Sci.*, 2011, **4**, 717–724.
